# Supplementary material for: Experimental Evolution Reveals Interplay between Sch9 and Polyploid Stability in Yeast
Source: PLoS Genet. 2016 Nov 3;12(11):e1006409. doi: 10.1371/journal.pgen.1006409 (PMC5094715; doi:10.1371/journal.pgen.1006409)
Supplement: S2 Table — (XLSX) [file pgen.1006409.s009.xlsx]

## Sheet: Sheet1
GO analysis of misregulated genes of the evo4N-4 shown in Table 4A, along with p-values corrected for biases due to non-uniformity in annotations.
Down regulated genes: (evo4/anc4)<0.5, p<0.005, BG>500									Upregulated genes: (evo4/anc4)>2, p<0.005, BG>500
Category	Hypergeometric test p-value	AEA-corrected p-value	Genes In Category from Cluster	No. genes from the input in given category	Total no. of genes in given category.	Enrichment score	Index in the Fig 4A		Category	Hypergeometric test p-value	AEA-corrected p-value	Genes In Category from Cluster	No. genes from the input in given category	Total no. of genes in given category.	Enrichment score	Index in the Fig 4A			Hypergeometric test p-value: is derived from Funspec
endonucleolytic cleavage to generate mature 3'-end of SSU-rRNA from (SSU-rRNA, 5.8S rRNA, LSU-rRNA) [GO:0000461]	4.521e-05	0.0458	RPS0A RPS21A RPS0B	3	4	39.75	a		'de novo' protein folding [GO:0006458]	3.337e-05	0.00173	MDJ1 HSP60 HSP82	3	6	14.1667	A			AEA-corrected p-value: are p-values corrected for the overestimation of significance of gene sets with very high number of annotations using Annotation Enrichment Analysis
GMP biosynthetic process [GO:0006177]	4.521e-05	0.039	IMD3 IMD4 GUA1	3	4	39.75	b		deadenylation-dependent decapping of nuclear-transcribed mRNA [GO:0000290]	0.0001933	0.00239	EDC2 DCS1 DCS2	3	10	8.5	B
phosphate metabolic process [GO:0006796]	0.0005918	0.0114	PHO11 PHO3 PHO5	3	8	19.875	c		protein refolding [GO:0042026]	3.256e-05	0.0239	HSP78 MDJ1 HSP60 HSP82	4	16	5.3125	C
maturation of 5.8S rRNA from tricistronic rRNA transcript (SSU-rRNA, 5.8S rRNA, LSU-rRNA) [GO:0000466]	9.605e-06	0.0128	MAK16 MAK5 SPB1 NSA2 RPF2	5	14	11.3571	d		nuclear-transcribed mRNA catabolic process, nonsense-mediated decay [GO:0000184]	0.001226	0.0104	EDC2 DCS1 DCS2	3	18	4.72222	D
ribosomal small subunit assembly [GO:0000028]	2.304e-12	0.0365	RPS11B RPS11A RPS17B NSR1 RPS0A RPS27B RPS0B RPS31 RPS17A	9	14	11.3571	e
transcription of nuclear rRNA large RNA polymerase I transcript [GO:0042790]	0.006184	0.0084	RPA34 RPA49 RPA190	3	17	9.35294	f
purine nucleotide biosynthetic process [GO:0006164]	0.007299	0.0085	IMD3 IMD4 GUA1	3	18	8.83333	g
maturation of LSU-rRNA from tricistronic rRNA transcript (SSU-rRNA, 5.8S rRNA, LSU-rRNA) [GO:0000463]	3.819e-05	0.0128	MAK16 MAK5 SPB1 NSA2 RPF2	5	18	8.83333	h
rRNA export from nucleus [GO:0006407]	1.643e-10	0.0028	RPS18A RPS26B RPS26A RPS0A RPS5 RPS0B RPS28B RPS3 RPS15 RPS10A	10	27	5.88889	i
dephosphorylation [GO:0016311]	0.005609	0.0044	PHO11 PHO3 PHO5 PHO12	4	32	4.96875	j
ribosomal large subunit biogenesis [GO:0042273]	5.592e-13	0.0384	MAK16 MAK5 YDL063C RLI1 NSA2 NOP7 TIF4631 SDA1 ALB1 MRT4 RLP24 ERB1 NIP7	13	37	4.2973	k
ribosomal large subunit assembly [GO:0000027]	7.43e-09	0.022	MAK21 RPL12B RPL12A MRT4 RPF2 RPP0 RPL6B RPL6A IPI3 NIP7	10	38	4.18421	l
endonucleolytic cleavage in ITS1 to separate SSU-rRNA from 5.8S rRNA and LSU-rRNA from tricistronic rRNA transcript (SSU-rRNA, 5.8S rRNA, LSU-rRNA) [GO:0000447]	2.698e-05	0.023	RPS18A RPS0A MPP10 RPS21A RPS0B UTP13 UTP14	7	40	3.975	m
maturation of SSU-rRNA from tricistronic rRNA transcript (SSU-rRNA, 5.8S rRNA, LSU-rRNA) [GO:0000462]	2.413e-12	0.0128	RPS8A RPS11B RPS9B RPS16B RPS11A RPS13 RPS8B NOP7 RPS27B FYV7 UTP13 RPS1A RPS1B RPS16A RPS9A	15	60	2.65	n
cellular amino acid biosynthetic process [GO:0008652]	0.0003563	0.01	LEU2 THR4 LYS4 HIS1 SER3 THR1 BAT1 ARG1 ASN1	9	98	1.62245	o
